# Supplementary material
Source: publisher figshare collection journal article supplement (https://acs.figshare.com/ndownloader/files/5087383)
Supplement: Supplementary file 1 [file 5087383]

data_abscor
 
_audit_creation_method            SHELXL-97
_chemical_name_systematic
;
 ?
;
_chemical_name_common             ?
_chemical_melting_point           ?
_chemical_formula_moiety          ?
_chemical_formula_sum
 'C38 H80 F6 I6 N5 O4 Pr S2'
_chemical_formula_weight          1751.50
 
loop_
 _atom_type_symbol
 _atom_type_description
 _atom_type_scat_dispersion_real
 _atom_type_scat_dispersion_imag
 _atom_type_scat_source
 'C'  'C'   0.0033   0.0016
 'International Tables Vol C Tables 4.2.6.8 and 6.1.1.4'
 'N'  'N'   0.0061   0.0033
 'International Tables Vol C Tables 4.2.6.8 and 6.1.1.4'
 'O'  'O'   0.0106   0.0060
 'International Tables Vol C Tables 4.2.6.8 and 6.1.1.4'
 'F'  'F'   0.0171   0.0103
 'International Tables Vol C Tables 4.2.6.8 and 6.1.1.4'
 'S'  'S'   0.1246   0.1234
 'International Tables Vol C Tables 4.2.6.8 and 6.1.1.4'
 'I'  'I'  -0.4742   1.8119
 'International Tables Vol C Tables 4.2.6.8 and 6.1.1.4'
 'Pr'  'Pr'  -0.2180   2.8214
 'International Tables Vol C Tables 4.2.6.8 and 6.1.1.4'
 'H'  'H'   0.0000   0.0000
 'International Tables Vol C Tables 4.2.6.8 and 6.1.1.4'
 
_symmetry_cell_setting            ?
_symmetry_space_group_name_H-M    ?
 
loop_
 _symmetry_equiv_pos_as_xyz
 'x, y, z'
 '-y+1/2, x+1/2, z+3/4'
 '-x, -y, z+1/2'
 'y+1/2, -x+1/2, z+1/4'
 'x+1/2, -y+1/2, -z+1/4'
 '-x+1/2, y+1/2, -z+3/4'
 'y, x, -z'
 '-y, -x, -z+1/2'
 
_cell_length_a                    14.648(2)
_cell_length_b                    14.648(2)
_cell_length_c                    28.469(5)
_cell_angle_alpha                 90.00
_cell_angle_beta                  90.00
_cell_angle_gamma                 90.00
_cell_volume                      6108.4(16)
_cell_formula_units_Z             4
_cell_measurement_temperature     173(2)
_cell_measurement_reflns_used     ?
_cell_measurement_theta_min       ?
_cell_measurement_theta_max       ?
 
_exptl_crystal_description        ?
_exptl_crystal_colour             ?
_exptl_crystal_size_max           ?
_exptl_crystal_size_mid           ?
_exptl_crystal_size_min           ?
_exptl_crystal_density_meas       ?
_exptl_crystal_density_diffrn     1.905
_exptl_crystal_density_method     'not measured'
_exptl_crystal_F_000              3352
_exptl_absorpt_coefficient_mu     3.953
_exptl_absorpt_correction_type    ?
_exptl_absorpt_correction_T_min   ?
_exptl_absorpt_correction_T_max   ?
_exptl_absorpt_process_details    ?
 
_exptl_special_details
;
 ?
;
 
_diffrn_ambient_temperature       173(2)
_diffrn_radiation_wavelength      0.71073
_diffrn_radiation_type            MoK\a
_diffrn_radiation_source          'fine-focus sealed tube'
_diffrn_radiation_monochromator   graphite
_diffrn_measurement_device_type   ?
_diffrn_measurement_method        ?
_diffrn_detector_area_resol_mean  ?
_diffrn_standards_number          ?
_diffrn_standards_interval_count  ?
_diffrn_standards_interval_time   ?
_diffrn_standards_decay_%         ?
_diffrn_reflns_number             60693
_diffrn_reflns_av_R_equivalents   0.1494
_diffrn_reflns_av_sigmaI/netI     0.1257
_diffrn_reflns_limit_h_min        -18
_diffrn_reflns_limit_h_max        18
_diffrn_reflns_limit_k_min        -18
_diffrn_reflns_limit_k_max        18
_diffrn_reflns_limit_l_min        -36
_diffrn_reflns_limit_l_max        36
_diffrn_reflns_theta_min          1.56
_diffrn_reflns_theta_max          27.39
_reflns_number_total              6870
_reflns_number_gt                 2998
_reflns_threshold_expression      >2sigma(I)
 
_computing_data_collection        ?
_computing_cell_refinement        ?
_computing_data_reduction         ?
_computing_structure_solution     ?
_computing_structure_refinement   'SHELXL-97 (Sheldrick, 1997)'
_computing_molecular_graphics     ?
_computing_publication_material   ?
 
_refine_special_details
;
 Refinement of F^2^ against ALL reflections.  The weighted R-factor wR and
 goodness of fit S are based on F^2^, conventional R-factors R are based
 on F, with F set to zero for negative F^2^. The threshold expression of
 F^2^ > 2sigma(F^2^) is used only for calculating R-factors(gt) etc. and is
 not relevant to the choice of reflections for refinement.  R-factors based
 on F^2^ are statistically about twice as large as those based on F, and R-
 factors based on ALL data will be even larger.
;
 
_refine_ls_structure_factor_coef  Fsqd
_refine_ls_matrix_type            full
_refine_ls_weighting_scheme       calc
_refine_ls_weighting_details
 'calc w=1/[\s^2^(Fo^2^)+(0.0266P)^2^+0.0000P] where P=(Fo^2^+2Fc^2^)/3'
_atom_sites_solution_primary      direct
_atom_sites_solution_secondary    difmap
_atom_sites_solution_hydrogens    geom
_refine_ls_hydrogen_treatment     mixed
_refine_ls_extinction_method      none
_refine_ls_extinction_coef        ?
_refine_ls_abs_structure_details
 'Flack H D (1983), Acta Cryst. A39, 876-881'
_refine_ls_abs_structure_Flack    -0.04(6)
_refine_ls_number_reflns          6870
_refine_ls_number_parameters      338
_refine_ls_number_restraints      15
_refine_ls_R_factor_all           0.1316
_refine_ls_R_factor_gt            0.0418
_refine_ls_wR_factor_ref          0.0827
_refine_ls_wR_factor_gt           0.0635
_refine_ls_goodness_of_fit_ref    0.794
_refine_ls_restrained_S_all       0.794
_refine_ls_shift/su_max           1.931
_refine_ls_shift/su_mean          0.175
 
loop_
 _atom_site_label
 _atom_site_type_symbol
 _atom_site_fract_x
 _atom_site_fract_y
 _atom_site_fract_z
 _atom_site_U_iso_or_equiv
 _atom_site_adp_type
 _atom_site_occupancy
 _atom_site_symmetry_multiplicity
 _atom_site_calc_flag
 _atom_site_refinement_flags
 _atom_site_disorder_assembly
 _atom_site_disorder_group
Pr1 Pr 0.76389(4) 0.76389(4) 0.5000 0.0475(2) Uani 1 2 d S . .
I1 I 0.77258(6) 0.97391(5) 0.52358(3) 0.0624(2) Uani 1 1 d . . .
S1 S 1.1496(7) 0.7644(10) 0.2116(5) 0.141(4) Uani 0.50 1 d PD A 1
O1 O 1.137(3) 0.671(2) 0.226(2) 0.32(5) Uani 0.50 1 d PD . .
I2 I 0.73105(6) 0.80280(5) 0.39363(2) 0.0589(2) Uani 1 1 d . . .
S2 S 1.2045(9) 0.7035(10) 0.2341(5) 0.131(4) Uani 0.50 1 d PD A .
O2 O 1.072(2) 0.792(3) 0.185(2) 0.21(2) Uani 0.50 1 d PD . .
I3 I 0.76652(6) 0.55286(5) 0.48729(3) 0.0635(2) Uani 1 1 d . . .
O4 O 1.2954(16) 0.711(3) 0.2199(12) 0.24(2) Uani 0.50 1 d PD . .
O5 O 1.140(2) 0.6335(17) 0.2360(12) 0.148(14) Uani 0.50 1 d PD A .
N10 N 0.9513(8) 0.5776(7) 0.3366(3) 0.059(3) Uani 1 1 d . . .
C10 C 0.9823(11) 0.5002(10) 0.3079(5) 0.100(5) Uani 1 1 d . . .
H10A H 0.9295 0.4632 0.2986 0.151 Uiso 1 1 calc R . .
H10B H 1.0247 0.4627 0.3262 0.151 Uiso 1 1 calc R . .
H10C H 1.0132 0.5231 0.2798 0.151 Uiso 1 1 calc R . .
C11 C 0.912(2) 0.5452(15) 0.3781(9) 0.230(15) Uani 1 1 d . . .
H11A H 0.8569 0.5076 0.3715 0.276 Uiso 1 1 calc R . .
H11B H 0.8946 0.5959 0.3994 0.276 Uiso 1 1 calc R . .
C12 C 0.997(2) 0.482(2) 0.4008(10) 0.239(18) Uani 1 1 d . . .
H12A H 1.0068 0.4226 0.3845 0.287 Uiso 1 1 calc R . .
H12B H 0.9933 0.4727 0.4352 0.287 Uiso 1 1 calc R . .
C13 C 1.063(3) 0.554(3) 0.3865(9) 0.30(2) Uani 1 1 d . . .
H13A H 1.0842 0.5852 0.4154 0.358 Uiso 1 1 calc R . .
H13B H 1.1169 0.5236 0.3725 0.358 Uiso 1 1 calc R . .
C14 C 1.0318(13) 0.6275(14) 0.3522(8) 0.132(7) Uani 1 1 d . . .
H14A H 1.0165 0.6858 0.3680 0.158 Uiso 1 1 calc R . .
H14B H 1.0762 0.6382 0.3266 0.158 Uiso 1 1 calc R . .
C15 C 0.893(2) 0.6414(19) 0.3136(7) 0.206(14) Uani 1 1 d . . .
H15A H 0.8318 0.6126 0.3138 0.247 Uiso 1 1 calc R . .
H15B H 0.8888 0.6942 0.3352 0.247 Uiso 1 1 calc R . .
C16 C 0.9022(11) 0.6796(11) 0.2686(5) 0.097(5) Uani 1 1 d . . .
H16A H 0.9636 0.7076 0.2669 0.116 Uiso 1 1 calc R . .
H16B H 0.9016 0.6286 0.2458 0.116 Uiso 1 1 calc R . .
C17 C 0.8367(18) 0.748(2) 0.2517(9) 0.242(17) Uani 1 1 d . . .
H17A H 0.7754 0.7197 0.2532 0.291 Uiso 1 1 calc R . .
H17B H 0.8368 0.7985 0.2749 0.291 Uiso 1 1 calc R . .
C18 C 0.8446(16) 0.7870(16) 0.2083(8) 0.192(12) Uani 1 1 d . . .
H18A H 0.7921 0.8270 0.2026 0.288 Uiso 1 1 calc R . .
H18B H 0.8463 0.7390 0.1844 0.288 Uiso 1 1 calc R . .
H18C H 0.9010 0.8228 0.2069 0.288 Uiso 1 1 calc R . .
N20 N 1.4324(12) 0.4596(9) 0.1443(6) 0.113(5) Uani 1 1 d . . .
C20 C 1.4783(18) 0.5391(18) 0.1674(9) 0.192(12) Uani 1 1 d . . .
H20A H 1.4330 0.5868 0.1738 0.289 Uiso 1 1 calc R . .
H20B H 1.5256 0.5634 0.1465 0.289 Uiso 1 1 calc R . .
H20C H 1.5063 0.5193 0.1969 0.289 Uiso 1 1 calc R . .
N21 N 1.219(3) 0.8293(19) 0.2319(9) 0.114(10) Uani 0.50 1 d P . .
C21 C 0.8869(19) 1.007(2) 0.3844(9) 0.198(18) Uani 1 1 d . . .
H21A H 0.8371 1.0364 0.3662 0.237 Uiso 1 1 calc R . .
H21B H 0.8621 0.9772 0.4127 0.237 Uiso 1 1 calc R . .
C22 C 1.0644(18) 1.045(3) 0.1495(18) 0.30(3) Uani 1 1 d . . .
H22A H 1.0921 0.9942 0.1316 0.360 Uiso 1 1 calc R . .
H22B H 1.1120 1.0803 0.1663 0.360 Uiso 1 1 calc R . .
C23 C 0.982(3) 1.0130(16) 0.1830(8) 0.200(15) Uani 1 1 d . . .
H23A H 0.9744 1.0566 0.2093 0.240 Uiso 1 1 calc R . .
H23B H 0.9950 0.9518 0.1961 0.240 Uiso 1 1 calc R . .
C24 C 0.8935(16) 1.0107(13) 0.1509(6) 0.135(8) Uani 1 1 d . . .
H24A H 0.8673 0.9485 0.1489 0.162 Uiso 1 1 calc R . .
H24B H 0.8462 1.0536 0.1623 0.162 Uiso 1 1 calc R . .
C25 C 0.5795(16) 0.6398(19) 0.3167(9) 0.146(9) Uani 1 1 d . . .
H25A H 0.6367 0.6655 0.3296 0.176 Uiso 1 1 calc R . .
H25B H 0.5968 0.6036 0.2887 0.176 Uiso 1 1 calc R . .
C26 C 1.292(2) 0.4684(15) 0.1984(9) 0.194(14) Uani 1 1 d . . .
H26A H 1.2583 0.4905 0.1704 0.233 Uiso 1 1 calc R . .
H26B H 1.3174 0.5229 0.2141 0.233 Uiso 1 1 calc R . .
C27 C 1.217(2) 0.426(2) 0.2334(9) 0.220(15) Uani 1 1 d . . .
H27A H 1.1585 0.4579 0.2292 0.264 Uiso 1 1 calc R . .
H27B H 1.2079 0.3605 0.2255 0.264 Uiso 1 1 calc R . .
C28 C 1.242(2) 0.4324(17) 0.2754(8) 0.189(10) Uani 1 1 d . . .
H28A H 1.1967 0.4041 0.2958 0.284 Uiso 1 1 calc R . .
H28B H 1.2491 0.4970 0.2836 0.284 Uiso 1 1 calc R . .
H28C H 1.3012 0.4013 0.2794 0.284 Uiso 1 1 calc R . .
C100 C 1.217(2) 0.746(2) 0.1571(9) 0.22(5) Uiso 0.50 1 d PD . .
F101 F 1.302(2) 0.718(3) 0.1642(12) 0.208(16) Uani 0.50 1 d PD A .
F102 F 1.1991(18) 0.812(2) 0.1270(9) 0.169(12) Uani 0.50 1 d PD A .
F103 F 1.175(4) 0.672(3) 0.1404(10) 0.184(18) Uani 0.50 1 d PD A .
C200 C 1.190(3) 0.751(2) 0.1745(9) 0.125(15) Uiso 0.50 1 d PD A .
F201 F 1.213(5) 0.691(3) 0.144(2) 0.39(5) Uani 0.50 1 d PD A .
F202 F 1.226(4) 0.829(2) 0.1654(17) 0.39(4) Uani 0.50 1 d PD A .
F203 F 1.102(3) 0.763(4) 0.1714(15) 0.32(4) Uani 0.50 1 d PD A .
 
loop_
 _atom_site_aniso_label
 _atom_site_aniso_U_11
 _atom_site_aniso_U_22
 _atom_site_aniso_U_33
 _atom_site_aniso_U_23
 _atom_site_aniso_U_13
 _atom_site_aniso_U_12
Pr1 0.0489(3) 0.0489(3) 0.0448(4) -0.0017(3) 0.0017(3) -0.0021(4)
I1 0.0814(6) 0.0476(4) 0.0582(4) -0.0022(3) -0.0044(4) -0.0023(5)
S1 0.088(7) 0.160(12) 0.176(12) 0.065(10) 0.011(8) 0.021(9)
O1 0.16(3) 0.10(3) 0.69(12) 0.17(4) -0.24(5) -0.08(2)
I2 0.0693(5) 0.0608(5) 0.0467(4) 0.0000(3) -0.0072(4) -0.0037(4)
S2 0.128(11) 0.124(10) 0.142(9) 0.014(8) -0.021(8) 0.003(9)
O2 0.058(15) 0.13(3) 0.43(7) 0.06(3) -0.08(3) -0.003(18)
I3 0.0676(5) 0.0501(4) 0.0728(5) -0.0079(4) 0.0086(5) -0.0028(4)
O4 0.14(3) 0.34(5) 0.24(3) -0.21(4) 0.11(3) -0.14(3)
O5 0.22(4) 0.076(19) 0.15(2) -0.023(17) 0.11(3) -0.01(2)
N10 0.075(8) 0.037(6) 0.064(6) -0.011(5) 0.010(6) 0.003(5)
C10 0.093(13) 0.096(13) 0.111(11) -0.042(9) 0.017(9) 0.028(9)
C11 0.37(4) 0.078(16) 0.24(3) -0.011(15) 0.25(3) -0.031(18)
C12 0.22(3) 0.24(4) 0.26(3) 0.18(3) 0.08(2) 0.08(3)
C13 0.47(7) 0.34(5) 0.089(18) 0.05(3) 0.02(3) 0.03(5)
C14 0.120(16) 0.121(16) 0.154(19) -0.047(14) -0.033(14) -0.029(13)
C15 0.31(3) 0.21(3) 0.093(14) -0.031(15) -0.015(17) 0.20(2)
C16 0.117(13) 0.101(13) 0.072(10) 0.014(9) -0.018(9) -0.014(10)
C17 0.26(3) 0.28(4) 0.19(2) 0.07(2) -0.04(2) 0.17(3)
C18 0.22(3) 0.17(2) 0.18(2) 0.11(2) -0.078(19) -0.04(2)
N20 0.152(15) 0.069(10) 0.119(12) 0.006(8) -0.061(11) -0.038(10)
C20 0.21(3) 0.15(2) 0.22(3) -0.031(19) -0.14(2) 0.02(2)
N21 0.16(3) 0.11(2) 0.068(16) -0.020(16) 0.027(19) -0.05(2)
C21 0.18(3) 0.25(4) 0.16(2) 0.07(2) -0.072(19) -0.16(3)
C22 0.079(18) 0.29(5) 0.53(7) 0.23(5) 0.00(3) -0.06(2)
C23 0.37(5) 0.082(16) 0.14(2) -0.011(14) -0.04(3) 0.09(2)
C24 0.21(2) 0.115(16) 0.083(12) 0.032(11) 0.079(14) -0.004(15)
C25 0.101(18) 0.19(3) 0.15(2) -0.050(18) -0.010(16) -0.020(18)
C26 0.30(4) 0.083(16) 0.20(2) -0.043(16) 0.08(3) -0.04(2)
C27 0.27(4) 0.26(3) 0.129(19) 0.06(2) -0.06(2) -0.09(3)
C28 0.23(3) 0.19(2) 0.147(19) -0.020(18) 0.01(2) 0.01(2)
F101 0.22(3) 0.19(3) 0.21(3) 0.02(3) 0.15(3) 0.02(3)
F102 0.15(2) 0.23(3) 0.13(2) 0.10(2) 0.003(16) 0.010(18)
F103 0.24(4) 0.20(3) 0.110(17) -0.03(2) 0.11(2) -0.09(3)
F201 0.40(11) 0.28(7) 0.49(9) 0.17(6) 0.30(8) 0.02(7)
F202 0.61(10) 0.17(4) 0.39(7) 0.19(4) -0.14(7) -0.22(5)
F203 0.35(6) 0.32(8) 0.28(5) 0.20(6) -0.19(5) -0.03(5)
 
_geom_special_details
;
 All esds (except the esd in the dihedral angle between two l.s. planes)
 are estimated using the full covariance matrix.  The cell esds are taken
 into account individually in the estimation of esds in distances, angles
 and torsion angles; correlations between esds in cell parameters are only
 used when they are defined by crystal symmetry.  An approximate (isotropic)
 treatment of cell esds is used for estimating esds involving l.s. planes.
;
 
loop_
 _geom_bond_atom_site_label_1
 _geom_bond_atom_site_label_2
 _geom_bond_distance
 _geom_bond_site_symmetry_2
 _geom_bond_publ_flag
Pr1 I3 3.1125(11) . ?
Pr1 I3 3.1125(11) 7_556 ?
Pr1 I2 3.1188(8) . ?
Pr1 I2 3.1188(8) 7_556 ?
Pr1 I1 3.1514(11) . ?
Pr1 I1 3.1514(11) 7_556 ?
S1 C200 1.23(4) . ?
S1 F203 1.34(4) . ?
S1 S2 1.362(15) . ?
S1 N21 1.51(3) . ?
S1 O2 1.429(19) . ?
S1 O1 1.437(18) . ?
S1 N21 1.66(3) 8_775 ?
S1 C100 1.86(2) . ?
S1 O5 2.04(3) . ?
S1 F202 1.97(4) . ?
O1 O5 0.62(4) . ?
O1 S2 1.11(3) . ?
S2 O4 1.395(16) . ?
S2 O5 1.393(18) . ?
S2 N21 1.57(4) 8_775 ?
S2 N21 1.86(3) . ?
S2 C200 1.844(18) . ?
S2 O4 1.80(3) 8_775 ?
S2 S2 2.11(3) 8_775 ?
S2 C100 2.28(3) . ?
O2 F203 0.73(10) . ?
O2 C200 1.86(6) . ?
O4 O4 1.72(7) 8_775 ?
O4 F101 1.59(5) . ?
O4 S2 1.80(3) 8_775 ?
N10 C15 1.426(19) . ?
N10 C10 1.470(14) . ?
N10 C11 1.399(19) . ?
N10 C14 1.457(19) . ?
C11 C12 1.69(4) . ?
C12 C13 1.49(5) . ?
C13 C14 1.52(3) . ?
C15 C16 1.41(2) . ?
C16 C17 1.47(2) . ?
C17 C18 1.36(3) . ?
N20 C21 1.41(2) 2_744 ?
N20 C24 1.474(19) 5_565 ?
N20 C20 1.50(3) . ?
N20 C25 1.64(3) 8_765 ?
N21 N21 1.44(5) 8_775 ?
N21 S2 1.57(4) 8_775 ?
N21 S1 1.66(3) 8_775 ?
N21 C200 2.05(4) . ?
C21 N20 1.41(2) 4_575 ?
C21 C22 1.74(4) 8_775 ?
C22 C23 1.60(4) . ?
C22 C21 1.74(4) 8_775 ?
C23 C24 1.59(3) . ?
C24 N20 1.474(19) 5_465 ?
C25 C26 1.30(3) 8_675 ?
C25 N20 1.64(3) 8_675 ?
C26 C25 1.30(3) 8_765 ?
C26 C27 1.60(3) . ?
C27 C28 1.25(2) . ?
C100 F201 0.89(6) . ?
C100 C200 0.64(4) . ?
C100 F101 1.322(19) . ?
C100 F102 1.323(19) . ?
C100 F103 1.32(2) . ?
C100 F202 1.26(5) . ?
C100 F203 1.75(5) . ?
F101 F201 1.47(8) . ?
F101 C200 1.73(5) . ?
F102 F202 1.19(5) . ?
F102 C200 1.63(3) . ?
F103 F201 0.63(9) . ?
F103 C200 1.52(5) . ?
C200 F202 1.296(18) . ?
C200 F201 1.283(19) . ?
C200 F203 1.299(19) . ?
 
loop_
 _geom_angle_atom_site_label_1
 _geom_angle_atom_site_label_2
 _geom_angle_atom_site_label_3
 _geom_angle
 _geom_angle_site_symmetry_1
 _geom_angle_site_symmetry_3
 _geom_angle_publ_flag
I3 Pr1 I3 92.19(4) . 7_556 ?
I3 Pr1 I2 94.05(2) . . ?
I3 Pr1 I2 87.56(2) 7_556 . ?
I3 Pr1 I2 87.56(2) . 7_556 ?
I3 Pr1 I2 94.05(2) 7_556 7_556 ?
I2 Pr1 I2 177.69(5) . 7_556 ?
I3 Pr1 I1 173.61(2) . . ?
I3 Pr1 I1 90.19(2) 7_556 . ?
I2 Pr1 I1 91.98(2) . . ?
I2 Pr1 I1 86.35(2) 7_556 . ?
I3 Pr1 I1 90.19(2) . 7_556 ?
I3 Pr1 I1 173.61(2) 7_556 7_556 ?
I2 Pr1 I1 86.35(2) . 7_556 ?
I2 Pr1 I1 91.98(2) 7_556 7_556 ?
I1 Pr1 I1 88.08(4) . 7_556 ?
C200 S1 F203 60.6(17) . . ?
C200 S1 S2 90.8(17) . . ?
F203 S1 S2 134(3) . . ?
C200 S1 N21 96.4(19) . . ?
F203 S1 N21 134(3) . . ?
S2 S1 N21 80.4(15) . . ?
C200 S1 O2 89(3) . . ?
F203 S1 O2 31(4) . . ?
S2 S1 O2 155(2) . . ?
N21 S1 O2 124(3) . . ?
C200 S1 O1 99(3) . . ?
F203 S1 O1 100(3) . . ?
S2 S1 O1 46.9(15) . . ?
N21 S1 O1 125(2) . . ?
O2 S1 O1 109(3) . . ?
C200 S1 N21 141(2) . 8_775 ?
F203 S1 N21 158(3) . 8_775 ?
S2 S1 N21 61.9(14) . 8_775 ?
N21 S1 N21 53.7(18) . 8_775 ?
O2 S1 N21 128(3) . 8_775 ?
O1 S1 N21 83(3) . 8_775 ?
C200 S1 C100 3(2) . . ?
F203 S1 C100 64(2) . . ?
S2 S1 C100 88.9(13) . . ?
N21 S1 C100 93.3(16) . . ?
O2 S1 C100 91(3) . . ?
O1 S1 C100 99(3) . . ?
N21 S1 C100 137.2(17) 8_775 . ?
C200 S1 O5 99.8(18) . . ?
F203 S1 O5 104(3) . . ?
S2 S1 O5 42.7(10) . . ?
N21 S1 O5 120.4(18) . . ?
O2 S1 O5 113(2) . . ?
O1 S1 O5 5(2) . . ?
N21 S1 O5 79.6(17) 8_775 . ?
C100 S1 O5 100.3(13) . . ?
C200 S1 F202 39.8(17) . . ?
F203 S1 F202 74.6(19) . . ?
S2 S1 F202 106.9(18) . . ?
N21 S1 F202 64.5(16) . . ?
O2 S1 F202 88(3) . . ?
O1 S1 F202 136(3) . . ?
N21 S1 F202 118(2) 8_775 . ?
C100 S1 F202 38.1(18) . . ?
O5 S1 F202 135.7(18) . . ?
O5 O1 S2 103(5) . . ?
O5 O1 S1 165(7) . . ?
S2 O1 S1 63.0(14) . . ?
O1 S2 S1 70.1(13) . . ?
O1 S2 O4 145(4) . . ?
S1 S2 O4 112(2) . . ?
O1 S2 O5 26(2) . . ?
S1 S2 O5 95.8(18) . . ?
O4 S2 O5 136(2) . . ?
O1 S2 N21 99(4) . 8_775 ?
S1 S2 N21 68.3(13) . 8_775 ?
O4 S2 N21 115.0(19) . 8_775 ?
O5 S2 N21 107.1(17) . 8_775 ?
O1 S2 N21 121(2) . . ?
S1 S2 N21 53.3(13) . . ?
O4 S2 N21 79(2) . . ?
O5 S2 N21 144(2) . . ?
N21 S2 N21 48.7(17) 8_775 . ?
O1 S2 C200 82(3) . . ?
S1 S2 C200 41.6(15) . . ?
O4 S2 C200 79(2) . . ?
O5 S2 C200 103(2) . . ?
N21 S2 C200 105.0(17) 8_775 . ?
N21 S2 C200 67.2(15) . . ?
O1 S2 O4 139(3) . 8_775 ?
S1 S2 O4 137.9(17) . 8_775 ?
O4 S2 O4 64(3) . 8_775 ?
O5 S2 O4 116(2) . 8_775 ?
N21 S2 O4 76.2(19) 8_775 8_775 ?
N21 S2 O4 86.3(18) . 8_775 ?
C200 S2 O4 138.3(19) . 8_775 ?
O1 S2 S2 157(4) . 8_775 ?
S1 S2 S2 99.3(11) . 8_775 ?
O4 S2 S2 57.7(13) . 8_775 ?
O5 S2 S2 152(2) . 8_775 ?
N21 S2 S2 58.4(11) 8_775 8_775 ?
N21 S2 S2 46.1(14) . 8_775 ?
C200 S2 S2 103.4(13) . 8_775 ?
O4 S2 S2 40.8(8) 8_775 8_775 ?
O1 S2 C100 89(3) . . ?
S1 S2 C100 54.5(9) . . ?
O4 S2 C100 68(2) . . ?
O5 S2 C100 106.8(19) . . ?
N21 S2 C100 114.9(14) 8_775 . ?
N21 S2 C100 72.1(13) . . ?
C200 S2 C100 13.0(16) . . ?
O4 S2 C100 130.0(19) 8_775 . ?
S2 S2 C100 101.0(13) 8_775 . ?
F203 O2 S1 68(3) . . ?
F203 O2 C200 32(4) . . ?
S1 O2 C200 41.2(13) . . ?
S2 O4 O4 70(2) . 8_775 ?
S2 O4 F101 110(3) . . ?
O4 O4 F101 180(3) 8_775 . ?
S2 O4 S2 81.5(16) . 8_775 ?
O4 O4 S2 46.6(11) 8_775 8_775 ?
F101 O4 S2 133(3) . 8_775 ?
O1 O5 S2 51(4) . . ?
O1 O5 S1 11(5) . . ?
S2 O5 S1 41.5(10) . . ?
C15 N10 C10 115.7(11) . . ?
C15 N10 C11 111.2(19) . . ?
C10 N10 C11 109.6(13) . . ?
C15 N10 C14 107.3(19) . . ?
C10 N10 C14 107.8(13) . . ?
C11 N10 C14 104.5(18) . . ?
N10 C11 C12 101.5(19) . . ?
C11 C12 C13 89(2) . . ?
C14 C13 C12 119(3) . . ?
N10 C14 C13 95(2) . . ?
C16 C15 N10 128.5(18) . . ?
C17 C16 C15 120.5(17) . . ?
C18 C17 C16 122(2) . . ?
C21 N20 C24 106.8(17) 2_744 5_565 ?
C21 N20 C20 113(2) 2_744 . ?
C24 N20 C20 109.1(15) 5_565 . ?
C21 N20 C25 106(2) 2_744 8_765 ?
C24 N20 C25 116.5(17) 5_565 8_765 ?
C20 N20 C25 105.3(18) . 8_765 ?
N21 N21 S1 68(2) 8_775 . ?
N21 N21 S2 76.1(16) 8_775 8_775 ?
S1 N21 S2 122(2) . 8_775 ?
N21 N21 S1 57.9(19) 8_775 8_775 ?
S1 N21 S1 126.1(19) . 8_775 ?
S2 N21 S1 49.8(11) 8_775 8_775 ?
N21 N21 S2 55.3(18) 8_775 . ?
S1 N21 S2 46.3(9) . . ?
S2 N21 S2 75.5(19) 8_775 . ?
S1 N21 S2 99.8(17) 8_775 . ?
N21 N21 C200 101(3) 8_775 . ?
S1 N21 C200 36.5(12) . . ?
S2 N21 C200 118(2) 8_775 . ?
S1 N21 C200 155.8(19) 8_775 . ?
S2 N21 C200 56.1(10) . . ?
N20 C21 C22 93(2) 4_575 8_775 ?
C23 C22 C21 92.6(19) . 8_775 ?
C22 C23 C24 106(2) . . ?
N20 C24 C23 100.3(19) 5_465 . ?
C26 C25 N20 122(2) 8_675 8_675 ?
C25 C26 C27 121(3) 8_765 . ?
C28 C27 C26 111(3) . . ?
F201 C100 C200 113(6) . . ?
F201 C100 F101 81(6) . . ?
C200 C100 F101 120(5) . . ?
F201 C100 F102 113(6) . . ?
C200 C100 F102 107(4) . . ?
F101 C100 F102 121(3) . . ?
F201 C100 F103 24(6) . . ?
C200 C100 F103 95(5) . . ?
F101 C100 F103 104(4) . . ?
F102 C100 F103 106(4) . . ?
F201 C100 F202 166(5) . . ?
C200 C100 F202 79(5) . . ?
F101 C100 F202 100(4) . . ?
F102 C100 F202 55(2) . . ?
F103 C100 F202 155(5) . . ?
F201 C100 F203 100(5) . . ?
C200 C100 F203 37(4) . . ?
F101 C100 F203 156(3) . . ?
F102 C100 F203 82(2) . . ?
F103 C100 F203 76(4) . . ?
F202 C100 F203 85(3) . . ?
F201 C100 S1 117(4) . . ?
C200 C100 S1 7(4) . . ?
F101 C100 S1 115(2) . . ?
F102 C100 S1 109(2) . . ?
F103 C100 S1 100(2) . . ?
F202 C100 S1 76(3) . . ?
F203 C100 S1 43.5(16) . . ?
F201 C100 S2 99(5) . . ?
C200 C100 S2 40(4) . . ?
F101 C100 S2 81.1(18) . . ?
F102 C100 S2 144(2) . . ?
F103 C100 S2 95.1(19) . . ?
F202 C100 S2 95(3) . . ?
F203 C100 S2 75.0(14) . . ?
S1 C100 S2 36.6(6) . . ?
C100 F101 F201 37(3) . . ?
C100 F101 O4 97(2) . . ?
F201 F101 O4 109(3) . . ?
C100 F101 C200 18.6(14) . . ?
F201 F101 C200 46.3(15) . . ?
O4 F101 C200 78.2(17) . . ?
F202 F102 C100 60(2) . . ?
F202 F102 C200 52.0(12) . . ?
C100 F102 C200 22.0(19) . . ?
F201 F103 C100 35(6) . . ?
F201 F103 C200 57(5) . . ?
C100 F103 C200 24.8(18) . . ?
C100 C200 S1 170(6) . . ?
C100 C200 F202 72(5) . . ?
S1 C200 F202 103(3) . . ?
C100 C200 F201 40(5) . . ?
S1 C200 F201 146(3) . . ?
F202 C200 F201 111(3) . . ?
C100 C200 F203 125(5) . . ?
S1 C200 F203 64(3) . . ?
F202 C200 F203 106(3) . . ?
F201 C200 F203 108(3) . . ?
C100 C200 F102 51(3) . . ?
S1 C200 F102 132(3) . . ?
F202 C200 F102 46(2) . . ?
F201 C200 F102 78(3) . . ?
F203 C200 F102 87(3) . . ?
C100 C200 F103 60(5) . . ?
S1 C200 F103 127(3) . . ?
F202 C200 F103 127(3) . . ?
F201 C200 F103 24(4) . . ?
F203 C200 F103 85(4) . . ?
F102 C200 F103 84(2) . . ?
C100 C200 F101 41(4) . . ?
S1 C200 F101 130(2) . . ?
F202 C200 F101 80(3) . . ?
F201 C200 F101 56(4) . . ?
F203 C200 F101 164(3) . . ?
F102 C200 F101 86(2) . . ?
F103 C200 F101 80(3) . . ?
C100 C200 S2 127(5) . . ?
S1 C200 S2 47.6(9) . . ?
F202 C200 S2 118(3) . . ?
F201 C200 S2 110(4) . . ?
F203 C200 S2 103(2) . . ?
F102 C200 S2 164(3) . . ?
F103 C200 S2 109(2) . . ?
F101 C200 S2 86.6(19) . . ?
C100 C200 O2 138(5) . . ?
S1 C200 O2 50(2) . . ?
F202 C200 O2 97(4) . . ?
F201 C200 O2 126(4) . . ?
F203 C200 O2 18(4) . . ?
F102 C200 O2 92(2) . . ?
F103 C200 O2 103(3) . . ?
F101 C200 O2 177(3) . . ?
S2 C200 O2 95(2) . . ?
C100 C200 N21 124(5) . . ?
S1 C200 N21 47.1(14) . . ?
F202 C200 N21 65(3) . . ?
F201 C200 N21 151(4) . . ?
F203 C200 N21 101(3) . . ?
F102 C200 N21 109(2) . . ?
F103 C200 N21 165(3) . . ?
F101 C200 N21 95(2) . . ?
S2 C200 N21 56.7(11) . . ?
O2 C200 N21 83(3) . . ?
C100 F201 F103 120(10) . . ?
C100 F201 C200 27(3) . . ?
F103 F201 C200 99(7) . . ?
C100 F201 F101 62(5) . . ?
F103 F201 F101 164(10) . . ?
C200 F201 F101 78(4) . . ?
F102 F202 C200 82(3) . . ?
F102 F202 C100 65(3) . . ?
C200 F202 C100 29(2) . . ?
F102 F202 S1 109(3) . . ?
C200 F202 S1 37(2) . . ?
C100 F202 S1 65.9(18) . . ?
O2 F203 C200 130(8) . . ?
O2 F203 S1 81(6) . . ?
C200 F203 S1 55(2) . . ?
O2 F203 C100 143(8) . . ?
C200 F203 C100 17.4(16) . . ?
S1 F203 C100 73(2) . . ?
 
_diffrn_measured_fraction_theta_max    0.994
_diffrn_reflns_theta_full              27.39
_diffrn_measured_fraction_theta_full   0.994
_refine_diff_density_max    0.792
_refine_diff_density_min   -1.463
_refine_diff_density_rms    0.129
